# Supplementary material for: Antioxidant and In Vitro Preliminary Anti-Inflammatory Activity of Castanea sativa (Italian Cultivar “Marrone di Roccadaspide” PGI) Burs, Leaves, and Chestnuts Extracts and Their Metabolite Profiles by LC-ESI/LTQOrbitrap/MS/MS
Source: PubMed Central journal article supplement (PMC7917746; doi:10.3390/antiox10020278), 2021-02-11
Supplement: antioxidants-10-00278-s001.pdf [file antioxidants-10-00278-s001.pdf]

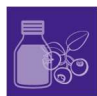

# Supplementary Materials: Antioxidant and *In Vitro* Preliminary Anti-Inflammatory Activity of *Castanea sativa* (Italian Cultivar “Marrone di Roccadaspide” PGI) Burs, Leaves, and Chestnuts Extracts and their Metabolite Profiles by LC-ESI/LTQOrbitrap/MS/MS

Antonietta Cerulli<sup>1</sup>, Assunta Napolitano<sup>1</sup>, Jan Hošek<sup>2</sup>, Milena Masullo<sup>1</sup>, Cosimo Pizza<sup>1</sup> and Sonia Piacente<sup>1,\*</sup>

<sup>1</sup> Dipartimento di Farmacia, Università degli Studi di Salerno, via Giovanni Paolo II n. 132, I-84084 Fisciano (SA), Italy; acerulli@unisa.it (A.C.); anapoli@unisa.it (A.N.); mmasullo@unisa.it (M.M.); pizza@unisa.it (C.P.)

<sup>2</sup> Division of Biologically Active Complexes and Molecular Magnets, Regional Centre of Advanced Technologies and Materials, Faculty of Science, Palacký University, Šlechtitelů 27, 78371 Olomouc, Czech Republic; hosek.jan@vri.cz

\* Correspondence: piacente@unisa.it (S.P.); Tel.: +39-089-969763; Fax: +39-089-969602

**Table S1.** LC–MS/MS conditions for quantitation of identified compounds by negative ion MRM.

| Compound                                                   | DP  | CE  | CXP |
|------------------------------------------------------------|-----|-----|-----|
| Crenatin (7)                                               | -37 | -28 | -19 |
| chestanin (21)                                             | -37 | -44 | -33 |
| cretanin (32)                                              | -54 | -36 | -24 |
| quercetin 3- <i>O</i> - $\beta$ -D-glucopyranoside (54)    | -37 | -30 | -31 |
| ellagic acid (60)                                          | -37 | -40 | -31 |
| isorhamnetin 3- <i>O</i> - $\beta$ -D-glucopyranoside (61) | -21 | -26 | -23 |
| quercetin-3- <i>O</i> - $\alpha$ -L-rhamnopyranoside (63)  | -75 | -34 | -26 |
| bartogenic acid (96)                                       | -37 | -44 | -23 |

Declustering potential (DP), collision energies (CE), and collision cell exit potential (CXP)
